# Supplementary material for: The Clinical Value of Pre-Diagnostic Thrombocytosis for the Detection of Lung Cancer in Primary Care
Source: MDPI journal article supplement (doi:10.3390/cancers16061154), 2024-03-14
Supplement: s1 [file s1]

**Table S4:** Conditional logistic regression for the predicted odds ratios and incidence of pre-diagnostic thrombocytosis occurrence for cases and controls, clustering by case-control matching identifier. Adjusted for significant predictors of pre-diagnostic thrombocytosis: smoking status, and previous COPD diagnosis. \* baseline variable, OR odds ratio, CI confidence interval.

|                                | Adj. OR | 95% CI     | p-value |
|--------------------------------|---------|------------|---------|
| <u>Case-control</u>            |         |            |         |
| Control                        | 1*      |            |         |
| Case                           | 6.3     | 5.6 to 7.2 | <0.001  |
| <u>Smoking-status</u>          |         |            |         |
| Never-smoker                   | 1*      |            |         |
| Ever-smoker                    | 1.3     | 1.0 to 1.6 | <0.05   |
| <u>Previous COPD diagnosis</u> |         |            |         |
| No                             | 1*      |            |         |
| Yes                            | 1.6     | 1.3 to 2.0 | <0.001  |
