# Supplementary material for: The Clinical Value of Pre-Diagnostic Thrombocytosis for the Detection of Lung Cancer in Primary Care
Source: MDPI journal article supplement (doi:10.3390/cancers16061154), 2024-03-14
Supplement: s1 [file s1]

**Table S3:** Sensitivity analysis on patients with a pre-diagnostic platelet count record only. Incidence of pre-diagnostic thrombocytosis in cases and controls, by sex and histological subtype for patients with a pre-diagnostic platelet count record. ADC adenocarcinoma, SCC squamous cell carcinoma, SCLC small cell lung cancer, CI confidence interval.

|                     | All patients, % (95% CI) |                  | Males, % (95% CI)   |                  | Females, % (95% CI) |                     |
|---------------------|--------------------------|------------------|---------------------|------------------|---------------------|---------------------|
|                     | Cases                    | Controls         | Cases               | Controls         | Cases               | Controls            |
| <b>All patients</b> | 18.3 (17.4 – 19.2)       | 3.0 (2.7 to 3.2) | 15.4 (14.2 to 16.6) | 1.7 (1.5 to 2.0) | 4.2 (3.9 to 4.7)    | 21.3 (20.0 to 22.8) |
| <b>ADC</b>          | 15.1 (13.7 – 16.7)       | 2.9 (2.5 to 3.3) | 12.3 (10.5 to 14.4) | 1.6 (1.2 to 2.1) | 4.0 (3.4 to 4.7)    | 17.8 (15.6 to 20.1) |
| <b>SCC</b>          | 22.5 (20.4 – 24.7)       | 2.6 (2.2 to 3.1) | 20.5 (18.0 to 23.3) | 1.8 (1.3 to 2.3) | 4.1 (3.2 to 5.1)    | 25.8 (22.3 to 29.6) |
| <b>SCLC</b>         | 16.0 (13.6 – 18.7)       | 2.7 (2.1 to 3.4) | 14.2 (10.9 to 18.1) | 1.8 (1.1 to 2.7) | 3.5 (2.5 to 4.7)    | 17.6 (14.1 to 21.6) |
