# Supplementary material for: The Clinical Value of Pre-Diagnostic Thrombocytosis for the Detection of Lung Cancer in Primary Care
Source: MDPI journal article supplement (doi:10.3390/cancers16061154), 2024-03-14
Supplement: s1 [file s1]

**Table S2:** Conditional logistic regression for the predicted odds ratios and incidence of pre-diagnostic thrombocytosis occurrence, clustering by case-control matching. Adjusted for significant predictors of pre-diagnostic thrombocytosis: smoking status, previous COPD diagnosis, and anti-platelet drug prescriptions.. \* baseline variable, OR odds ratio, CI confidence interval.

|                                        | Adj. OR | 95% CI     | p-value |
|----------------------------------------|---------|------------|---------|
| <u>Case-control</u>                    |         |            |         |
| Control                                | 1*      |            |         |
| Case                                   | 8.9     | 8.0 to 9.9 | <0.001  |
| <u>Smoking-status</u>                  |         |            |         |
| Never-smoker                           | 1*      |            |         |
| Ever-smoker                            | 1.5     | 1.2 to 1.8 | 0.001   |
| <u>Previous COPD diagnosis</u>         |         |            |         |
| No                                     | 1*      |            |         |
| Yes                                    | 2.7     | 2.2 to 3.3 | <0.001  |
| <u>Anti-platelet drug prescription</u> |         |            |         |
| No                                     | 1*      |            |         |
| Yes                                    | 1.2     | 1.0 to 1.4 | <0.05   |
