# Supplementary material for: The Clinical Value of Pre-Diagnostic Thrombocytosis for the Detection of Lung Cancer in Primary Care
Source: MDPI journal article supplement (doi:10.3390/cancers16061154), 2024-03-14
Supplement: s1 [file s1]

**Table S1.** STROBE Statement—Checklist of items that should be included in reports of *cohort studies*

|                              | Item No | Recommendation                                                                                                                                                                       | Page No. | Section                                                |
|------------------------------|---------|--------------------------------------------------------------------------------------------------------------------------------------------------------------------------------------|----------|--------------------------------------------------------|
| Title and abstract           | 1       | (a) Indicate the study's design with a commonly used term in the title or the abstract                                                                                               | 1        | Abstract                                               |
|                              |         | (b) Provide in the abstract an informative and balanced summary of what was done and what was found                                                                                  | 1        | Abstract                                               |
| <b>Introduction</b>          |         |                                                                                                                                                                                      |          |                                                        |
| Background/rationale         | 2       | Explain the scientific background and rationale for the investigation being reported                                                                                                 | 1-2      | 1. Introduction                                        |
| Objectives                   | 3       | State specific objectives, including any prespecified hypotheses                                                                                                                     | 2        | 1.Introduction                                         |
| <b>Methods</b>               |         |                                                                                                                                                                                      |          |                                                        |
| Study design                 | 4       | Present key elements of study design early in the paper                                                                                                                              | 2-3      | 2.1 data sources and patients                          |
| Setting                      | 5       | Describe the setting, locations, and relevant dates, including periods of recruitment, exposure, follow-up, and data collection                                                      | 2-3      | 2.1: data sources and patients                         |
| Participants                 | 6       | (a) Give the eligibility criteria, and the sources and methods of selection of participants. Describe methods of follow-up                                                           | 3        | 2.1 data sources and patients                          |
|                              |         | (b) For matched studies, give matching criteria and number of exposed and unexposed                                                                                                  | 3        | 2.1 data sources and patients                          |
| Variables                    | 7       | Clearly define all outcomes, exposures, predictors, potential confounders, and effect modifiers. Give diagnostic criteria, if applicable                                             | 3        | 2.1 data sources and patients<br>2.2 study definitions |
| Data sources/<br>measurement | 8*      | For each variable of interest, give sources of data and details of methods of assessment (measurement). Describe comparability of assessment methods if there is more than one group | 3        | 2.1 data sources and patients<br>2.2 study definitions |
| Bias                         | 9       | Describe any efforts to address potential sources of bias                                                                                                                            | 5        | 2.4 statistical analysis of data                       |
| Study size                   | 10      | Explain how the study size was arrived at                                                                                                                                            | 3        | 2.3 sample size calculations                           |
| Quantitative variables       | 11      | Explain how quantitative variables were handled in the analyses. If applicable, describe which groupings were chosen and why                                                         | 3        | 2.2 study definitions                                  |

|                     |     |                                                                                                                                                                                                              |     |                                       |
|---------------------|-----|--------------------------------------------------------------------------------------------------------------------------------------------------------------------------------------------------------------|-----|---------------------------------------|
| Statistical methods | 12  | (a) Describe all statistical methods, including those used to control for confounding                                                                                                                        | 4   | 2.4 statistical analysis of data      |
|                     |     | (b) Describe any methods used to examine subgroups and interactions                                                                                                                                          | 4-5 | 2.4 statistical analysis of data      |
|                     |     | (c) Explain how missing data were addressed                                                                                                                                                                  | 3   | 2.2 study definitions                 |
|                     |     | (d) If applicable, explain how loss to follow-up was addressed                                                                                                                                               |     | N/A                                   |
|                     |     | (e) Describe any sensitivity analyses                                                                                                                                                                        | 5   | 2.4 statistical analysis of data      |
| Results             |     |                                                                                                                                                                                                              |     |                                       |
| Participants        | 13* | (a) Report numbers of individuals at each stage of study—eg numbers potentially eligible, examined for eligibility, confirmed eligible, included in the study, completing follow-up, and analysed            | 5-5 | 3.1 patient characteristics           |
|                     |     | (b) Give reasons for non-participation at each stage                                                                                                                                                         | 5-6 | 3.1 patient characteristics           |
|                     |     | (c) Consider use of a flow diagram                                                                                                                                                                           | 5   | 3.1 patient characteristics, Figure 1 |
| Descriptive data    | 14* | (a) Give characteristics of study participants (eg demographic, clinical, social) and information on exposures and potential confounders                                                                     | 5-6 | 3.1 patient characteristics, Table 1  |
|                     |     | (b) Indicate number of participants with missing data for each variable of interest                                                                                                                          | 6   | 3.1 patient characteristics           |
|                     |     | (c) Summarise follow-up time (eg, average and total amount)                                                                                                                                                  | 3   | 2.2 study definitions                 |
| Outcome data        | 15* | Report numbers of outcome events or summary measures over time                                                                                                                                               | 6   | 3.1 patient characteristics           |
| Main results        | 16  | (a) Give unadjusted estimates and, if applicable, confounder-adjusted estimates and their precision (eg, 95% confidence interval). Make clear which confounders were adjusted for and why they were included | 6-7 | 3.2 pre-diagnostic thrombocytosis     |
|                     |     | (b) Report category boundaries when continuous variables were categorized                                                                                                                                    | 3   | 2.2 study definitions                 |
|                     |     | (c) If relevant, consider translating estimates of relative risk into absolute risk for a meaningful time period                                                                                             |     | N/A                                   |

|                          |    |                                                                                                                                                                            |       |                                                       |
|--------------------------|----|----------------------------------------------------------------------------------------------------------------------------------------------------------------------------|-------|-------------------------------------------------------|
| Other analyses           | 17 | Report other analyses done—eg analyses of subgroups and interactions, and sensitivity analyses                                                                             | 7     | 3.2 pre-diagnostic thrombocytosis and Supplementary 2 |
|                          |    |                                                                                                                                                                            | 10    | 3.3 stage at diagnosis                                |
| <b>Discussion</b>        |    |                                                                                                                                                                            |       |                                                       |
| Key results              | 18 | Summarise key results with reference to study objectives                                                                                                                   | 11    | 4. Discussion (first paragraph)                       |
| Limitations              | 19 | Discuss limitations of the study, taking into account sources of potential bias or imprecision. Discuss both direction and magnitude of any potential bias                 | 12-13 | 4. Discussion (final paragraph)                       |
| Interpretation           | 20 | Give a cautious overall interpretation of results considering objectives, limitations, multiplicity of analyses, results from similar studies, and other relevant evidence | 13    | Conclusion                                            |
| Generalisability         | 21 | Discuss the generalisability (external validity) of the study results                                                                                                      | 13    | Conclusion                                            |
| <b>Other information</b> |    |                                                                                                                                                                            |       |                                                       |
| Funding                  | 22 | Give the source of funding and the role of the funders for the present study and, if applicable, for the original study on which the present article is based              | 13    | Funding                                               |

\*Give information separately for exposed and unexposed groups.

**Note:** An Explanation and Elaboration article discusses each checklist item and gives methodological background and published examples of transparent reporting. The STROBE checklist is best used in conjunction with this article (freely available on the Web sites of PLoS Medicine at <http://www.plosmedicine.org/>, Annals of Internal Medicine at <http://www.annals.org/>, and Epidemiology at <http://www.epidem.com/>, all accessed on 11 March 2024). Information on the STROBE Initiative is available at <http://www.strobe-statement.org>, accessed on 11 March 2024.
